# Supplementary material
Source: PubMed Central journal article supplement (PMC3939314)
Supplement: NIHMS557390-supplement-01.pdf [file NIHMS557390-supplement-01.pdf]

## Supplemental Figure 1

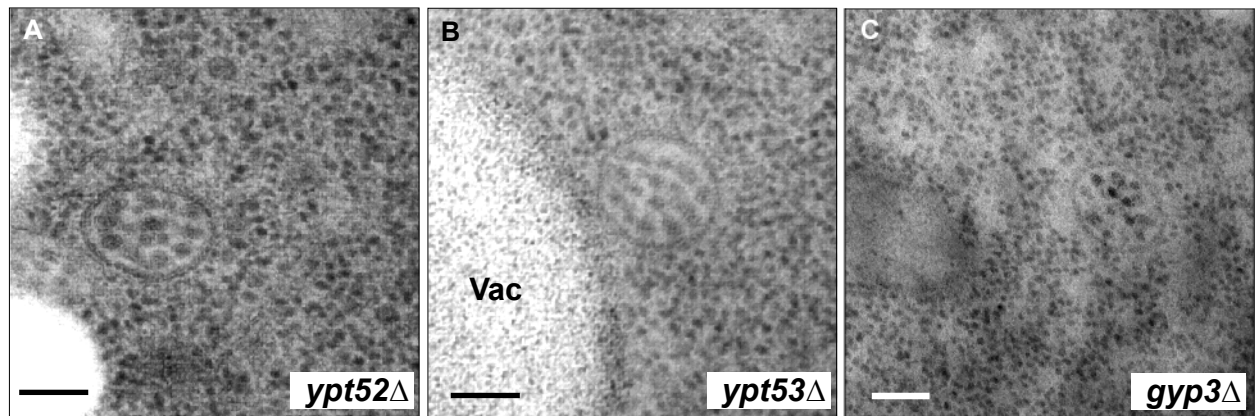

**Supplementary Figure S1.** Endosome morphology. (A-C) Thin-section electron micrographs show endosomes in *ypt52*Δ (A), *ypt53*Δ (B) or *gyp3*Δ (C) cells, all possessing characteristic MVB morphology. Bar, 100 nm. Vac, vacuole.

## Supplemental Figure 2

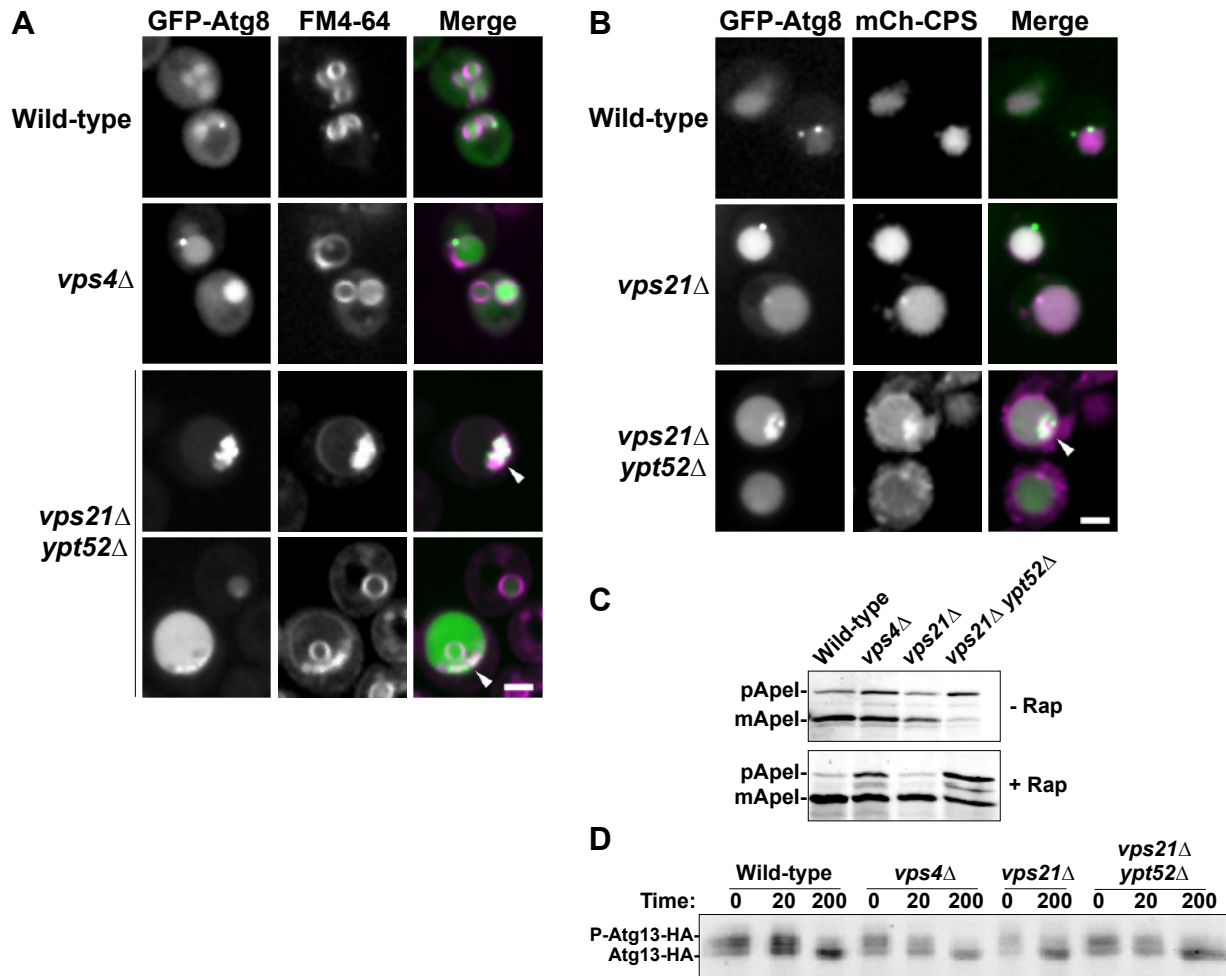

**Supplementary Figure S2.** Autophagy in Rab5-deficient cells. (A-B) Confocal fluorescence microscopy of GFP-Atg8 expressed in cells stained with FM 4-64 (A) or co-expressing MVB cargo mCherry-CPS (B). Scale bars, 2  $\mu$ m. (C) Western blot analysis of Apel maturation in cell lysates with or without rapamycin treatment. (D) Western blot analysis of a timecourse following rapamycin treatment, indicating dephosphorylation of the TOR kinase substrate Atg13. pApel, premature Apel. mApel, mature Apel. P-Atg13-HA, phospho-Atg13-HA.

### Supplemental Figure 3

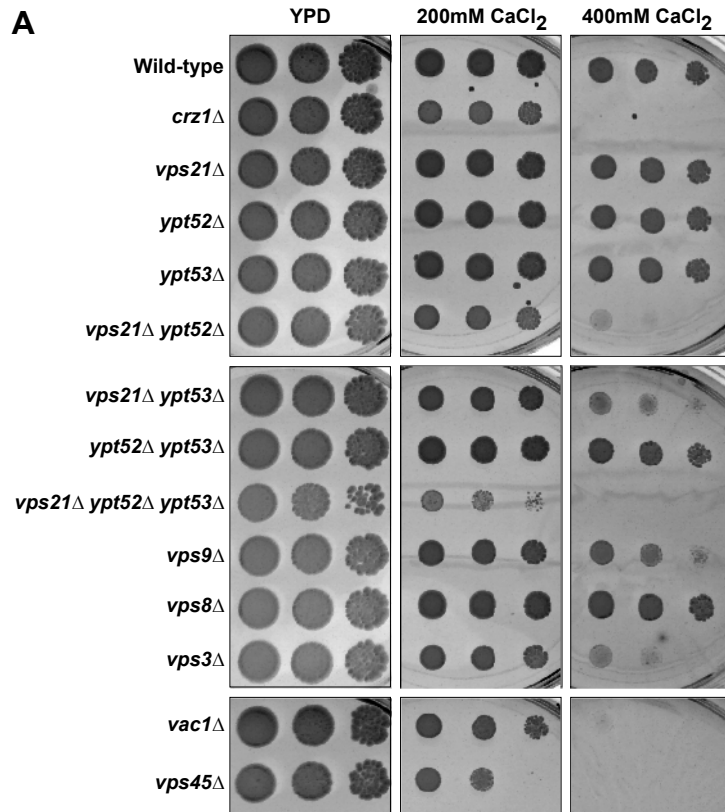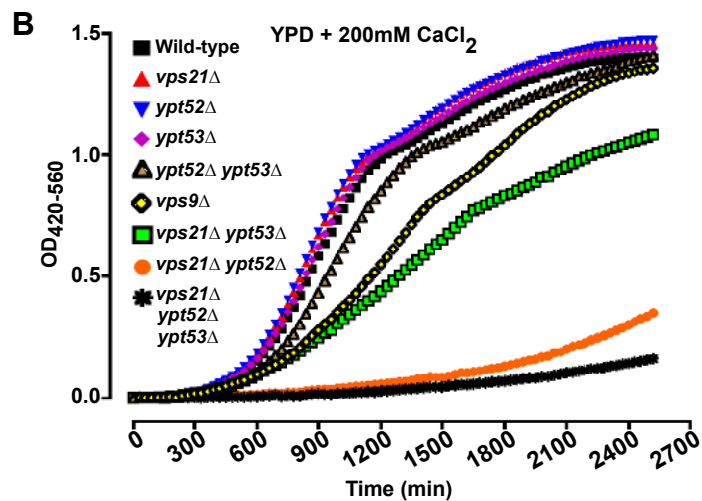

**Supplementary Figure S3.** Rab5 signaling and effectors are required to resist Ca<sup>2+</sup> stress. (A) Limiting dilution plate growth assay using YPD agar with the indicated concentrations of added Ca<sup>2+</sup>. (B) Growth curves in YPD broth supplemented with 200 mM Ca<sup>2+</sup>. For all experiments, cells were grown at 30° C.

## Supplemental Figure 4

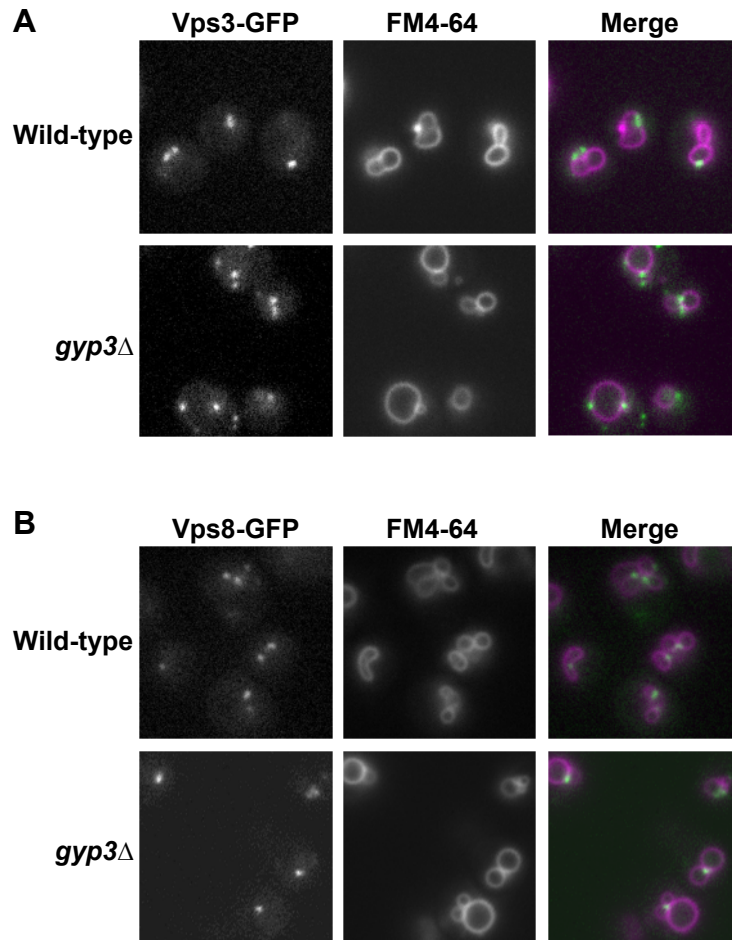

**Supplementary Figure S4.** Peri-vacuolar localization of Rab5 effector molecules in wild-type and *gyp3* $\Delta$  cells. (A-B) Fluorescence microscopy of FM 4-64-stained cells expressing either Vps3-GFP (A) or Vps8-GFP (B).
